# Supplementary material for: G-quadruplex as a new class of structural entities for directing the formation of circular oligodeoxyribonucleotidesElectronic supplementary information (ESI) available: experimental procedures. See http://www.rsc.org/suppdata/cc/b2/b208075n/
Source: Royal Society of Chemistry journal article supplement (doi:10.1039/b208075n), 2002-10-16
Supplement: b208075n.doc [file b208075n.doc]

# Electronic Supplementary Information

# G-quadruplex as a new class of structural entities for directing the formation of circular oligodeoxyribonucleotides

Jian Chen, Dongsheng Liu, Alex H. F. Lee, Jianying Qi, Albert S. C. Chan* and Tianhu Li*,

# Experimental Procedures

Radioactive linear strands were prepared by phosphorylation of the synthetic oligodeoxyribonucleotides (Operon Technologies, Inc) at their 5’ ends with [-32P] ATP and T4 polynucleotide kinase. The corresponding reaction products were analyzed via 20% denaturing polyacrylamide gel electrophoresis (PAGE) and visualized by autoradiography. Fig. 2a. Production of circular oligodeoxyribonucleotides. Lane 1: sequence 1 alone. Lane 2: same reaction as Lane 4 except for the absence of N-cyanoimidazole. Lanes 3-7: stock solutions of sequence 1 in 200 mM MES (pH 6.2) and 100 mM KCl were kept at 25 °C for 4 h to allow the formation of dimeric complexes. The reaction mixtures consisting of 10 nM (Lane 3), 100 nM (Lane 4), 1 mM (Lane 5), 10 M (Lane 6), 25 M (Lane 7) of sequence 1 taken from the stock solution, 200 mM MES (pH 6.2), 50 mM KCl, 50 mM MnCl2 and 50 mM N-cyanoimidazole in a total volume of 40 mL were subsequently prepared and incubated at 25 °C for 12 h. Lane 8: 5’ pAATTAAAAATTAAA 3’ alone. Lane 9: same reaction as the one loaded in lane 4 except for replacing sequence **2** with 5’ pAATTAAAAATTAAA 3’. Lane 10: 10-mer [5’ AAGAGGAGAA 3’] alone. Fig. 2b) Hydrolysis of the identified circular products by exodeoxyribonuclease. Lane 1: sequence 1 alone. Lane 2: sequence 1 after treatment with 20 units of exonuclease VII at 37 °C for 2 h. Lane 3: the identified circular products alone. Lane 4: the identified circular product after treatment with 20 units of exonuclease VII at 37 °C for 2 h. Fig. 2c. Conformation-dependency of the circularization course. The reactions were carried out in the same way as the one loaded in Lane 4 in Fig. 2a except for replacing sequence 1 with 0.1 M of the corresponding “mismatched” sequences. Lane 1: sequence **1** alone; Lane 2: same reaction as Lane 4 in Fig. 2A with 0.1 mM of sequence 1; Lane 3: mis-1a (5’ p**C**GTTAGGGGTTAGG 3’) alone. Lane 4: reaction mixture of mis-1a; Lane 5: mis-1b alone (5’ p**T**GTTAGGGGTTAGG 3’); Lane 6: reaction mixture of mis-1b; Lane 7: mis-1c alone (5’ p**A**GTTAGGGGTTAGG 3’); Lane 8: reaction mixture of mis-1c; Lane 9: mis-2a alone (5’ p**A**GTTAGGGGTTAG**A** 3’); Lane 10: reaction mixture of mis-2.
